# Supplementary material for: Antimicrobial Resistance and Antimicrobial Activity of Staphylococcus lugdunensis Obtained from Two Spanish Hospitals
Source: MDPI journal article supplement (doi:10.3390/microorganisms10081480), 2022-07-22
Supplement: s1 [file s1]

Supplementary material

**Table S1.** Clinical characteristics of the *S. lugdunensis* isolates included in the study.

| Isolate | Origin <sup>a</sup> | Sex <sup>b</sup> | Age | Service                        | Hospital <sup>c</sup> |
|---------|---------------------|------------------|-----|--------------------------------|-----------------------|
| C10342  | Blood               | M                | -   | Infectious disease service     | HSP                   |
| C10108  | Blood               | M                | 55  | Cardiology                     | HRV                   |
| C10107  | Blood               | M                | 82  | Internal Medicine/Traumatology | HRV                   |
| C10109  | Blood               | M                | 51  | Emergency service              | HRV                   |
| C9143   | Blood               | F                | 81  | Emergency service              | HSP                   |
| C9142   | Blood               | F                | 34  | Emergency service              | HSP                   |
| C9912   | Blood               | M                | 82  | Emergency service              | HSP                   |
| C9144   | Blood               | M                | 69  | Emergency service              | HSP                   |
| C9151   | Catheter            | M                | 57  | Nephrology                     | HSP                   |
| C9148   | Catheter            | M                | 69  | Nephrology                     | HSP                   |
| C9147   | Catheter            | M                | 53  | Nephrology                     | HSP                   |
| C9161   | Catheter            | M                | 69  | Nephrology                     | HSP                   |
| C9954   | Catheter            | M                | 57  | Nephrology                     | HSP                   |
| C9982   | Catheter            | M                | 74  | Nephrology                     | HSP                   |
| X700    | Catheter            | M                | 51  | Nephrology                     | HSP                   |
| C9145   | Catheter            | F                | 73  | Nephrology                     | HSP                   |
| X312    | Catheter            | M                | 57  | Nephrology                     | HSP                   |
| X536    | Catheter            | F                | 75  | Nephrology                     | HSP                   |
| C10341  | Catheter            | M                | 74  | Nephrology                     | HSP                   |
| X313    | Catheter            | F                | 45  | Home hospitalization           | HSP                   |
| C9146   | Catheter            | M                | 54  | Nephrology                     | HSP                   |
| C9925   | Epidemiological     | F                | 66  | Internal Medicine/Traumatology | HRV                   |
| C10513  | Genital Exudate     | F                | 39  | Primary care                   | HSP                   |
| C9149   | Genital Exudate     | F                | 41  | Gynaecology                    | HSP                   |
| C9150   | Genital Exudate     | M                | 25  | Primary care                   | HSP                   |
| X314    | Genital Exudate     | F                | 29  | Gynaecology                    | HSP                   |
| C9343   | SSTI                | F                | 2   | Emergency service              | HSP                   |
| X463    | SSTI                | M                | 70  | General Surgery                | HRV                   |
| C10052  | SSTI                | F                | 93  | Primary care                   | HSP                   |
| C10320  | SSTI                | F                | 58  | Gynaecology                    | HSP                   |
| C9896   | SSTI                | M                | 76  | Traumatology                   | HSP                   |
| C10511  | SSTI                | F                | 43  | Gynaecology                    | HSP                   |
| C9894   | SSTI                | M                | 55  | Traumatology                   | HSP                   |
| C10343  | SSTI                | M                | 50  | Angiology and vascular surgery | HSP                   |
| C9342   | SSTI                | F                | 49  | Primary care                   | HSP                   |
| C9895   | SSTI                | F                | 89  | Internal Medicine              | HSP                   |
| C10042  | SSTI                | F                | 38  | Gynaecology                    | HSP                   |
| C10248  | SSTI                | F                | 46  | Gynaecology                    | HSP                   |
| C10510  | SSTI                | M                | 40  | Primary care                   | HSP                   |
| X462    | SSTI                | M                | 43  | Emergency service              | HRV                   |
| C9890   | SSTI                | M                | 67  | Primary care                   | HSP                   |
| C10053  | SSTI                | F                | 24  | Primary care                   | HSP                   |

|        |       |   |    |                   |     |
|--------|-------|---|----|-------------------|-----|
| C9892  | SSTI  | F | 51 | Primary care      | HSP |
| C9893  | SSTI  | M | 72 | Primary care      | HSP |
| C9897  | SSTI  | M | 72 | Nephrology        | HSP |
| C10112 | SSTI  | M | 73 | Primary care      | HSP |
| C9891  | SSTI  | M | 73 | Emergency service | HSP |
| C9927  | SSTI  | F | 54 | Traumatology      | HRV |
| C10113 | SSTI  | F | 31 | Emergency service | HSP |
| X508   | Urine | M | 89 | Primary care      | HSP |
| C10247 | Urine | F | 36 | Primary care      | HSP |
| C9980  | Urine | F | 81 | Primary care      | HSP |
| C9981  | Urine | F | 26 | Primary care      | HSP |
| C9889  | Urine | M | 76 | Emergency service | HSP |
| C9159  | Urine | M | 89 | Emergency service | HRV |
| C9911  | Urine | F | 25 | General surgery   | HSP |

<sup>a</sup>Origin: SSTI: skin and soft tissue infection.

<sup>b</sup>Sex: M, male; F, female.

<sup>c</sup>Hospital: HSP, San Pedro Hospital; HRV, Royo Villanova Hospital.

**Table S2.** Characteristics of the 37 indicator bacteria used in this study for the screening of antimicrobial activity production in the collection of 56 *S. lugdunensis* isolates.

| Specie (no of strains)                | Strain           | Origin      | Relevant Antimicrobial Resistance Phenotype/Genotype |
|---------------------------------------|------------------|-------------|------------------------------------------------------|
| <i>S. aureus</i> (4)                  | C1570            | Human       | Methicillin/ <i>mecA</i> <sup>a</sup>                |
|                                       | C7246            | Human       | Methicillin/ <i>mecC</i> <sup>a</sup>                |
|                                       | C5313            | Human       | Methicillin/ <i>mecA</i>                             |
|                                       | ATCC29213 (C411) |             |                                                      |
| <i>S. delphini</i> (1)                | C9459            | Wild animal |                                                      |
| <i>S. pseudintermedius</i> (12)       | C2381            | Pet         | Methicillin/ <i>mecA</i>                             |
|                                       | C3930            | Pet         | Methicillin/ <i>mecA</i>                             |
|                                       | C2382            | Pet         | Methicillin/ <i>mecA</i>                             |
|                                       | C8187            | Human       | MDR                                                  |
|                                       | C2915            | Human       |                                                      |
|                                       | C2912            | Pet         |                                                      |
|                                       | C8189            | Human       |                                                      |
|                                       | C3917            | Human       |                                                      |
|                                       | C8188            | Human       |                                                      |
|                                       | C8368            | Human       |                                                      |
|                                       | C3007            | Pet         |                                                      |
|                                       | C3468            | Pet         |                                                      |
| <i>S. epidermidis</i> (1)             | C2663            | Human       | Methicillin/ <i>mecA</i> and Linezolid               |
| <i>S. haemolyticus</i> (1)            | C2709            | Human       | Linezolid                                            |
| <i>S. lugdunensis</i> (6)             | C9927            | Human       |                                                      |
|                                       | C9981            | Human       |                                                      |
|                                       | C9159            | Human       |                                                      |
|                                       | C10107           | Human       |                                                      |
|                                       | C9954            | Human       |                                                      |
|                                       | C9980            | Human       |                                                      |
| <i>S. sciuri</i> (1)                  | C9780            | Wild animal |                                                      |
| <i>Enterococcus casseliflavus</i> (1) | C1232            |             |                                                      |
| <i>E. durans</i> (1)                  | C1433            |             | Vancomycin/ <i>vanA</i>                              |
| <i>E. faecalis</i> (1)                | C3735            |             | Vancomycin/ <i>vanB2</i>                             |
| <i>E. faecalis</i> (1)                | ATCC29212 (C410) |             |                                                      |
| <i>E. faecium</i> (1)                 | C2321            |             | Vancomycin/ <i>vanA</i>                              |
| <i>E. gallinarum</i> (1)              | C2310            |             |                                                      |
| <i>E. hirae</i> (1)                   | C1436            |             | Vancomycin/ <i>vanA</i>                              |
| <i>Listeria monocytogenes</i> (1)     | CECT4032 (C137)  |             |                                                      |
| <i>Micrococcus luteus</i>             | C157             |             |                                                      |
| <i>Escherichia coli</i> (1)           | ATCC25922 (C408) |             |                                                      |
| <i>Pseudomonas aeruginosa</i> (1)     | C3282            |             |                                                      |

<sup>a</sup>The C1570 isolate belonged to ST398 and the C7246 isolates belonged to ST1945.

**Table S3.** Antimicrobial activity profile of the 23 *S. lugdunensis* isolates characterized as antimicrobial producers against the 37 indicator bacteria.

[illegible]

|                                     |               |   |   |   |   |   |   |   |   |   |   |   |   |   |   |   |   |   |   |   |   |   |   |   |
|-------------------------------------|---------------|---|---|---|---|---|---|---|---|---|---|---|---|---|---|---|---|---|---|---|---|---|---|---|
|                                     | <b>C10107</b> | 0 | 0 | 0 | 0 | 0 | 0 | 0 | 0 | 0 | 0 | 0 | 0 | 0 | 0 | 0 | 0 | 0 | 0 | 0 | 0 | 0 | 0 | 0 |
|                                     | <b>C9954</b>  | 0 | 0 | 0 | 0 | 0 | 0 | 0 | 0 | 0 | 0 | 0 | 0 | 0 | 0 | 0 | 0 | 0 | 0 | 0 | 0 | 0 | 0 | 0 |
|                                     | <b>C9980</b>  | 2 | 2 | 0 | 0 | 0 | 0 | 0 | 0 | 0 | 0 | 0 | 0 | 0 | 0 | 0 | 0 | 0 | 0 | 0 | 0 | 0 | 0 | 0 |
| <i>S.sciuri</i>                     | <b>C9780</b>  | 2 | 2 | 0 | 2 | 2 | 2 | 0 | 2 | 0 | 2 | 0 | 1 | 0 | 0 | 0 | 0 | 0 | 0 | 0 | 0 | 0 | 0 | 0 |
| <i>Enterococcus . casseliflavus</i> | <b>C1232</b>  | 0 | 0 | 0 | 2 | 1 | 0 | 2 | 0 | 0 | 0 | 0 | 0 | 0 | 0 | 0 | 0 | 0 | 0 | 0 | 0 | 0 | 0 | 0 |
| <i>E. durans vanA</i>               | <b>C1433</b>  | 0 | 1 | 0 | 0 | 0 | 0 | 0 | 0 | 0 | 0 | 0 | 0 | 0 | 0 | 0 | 0 | 0 | 0 | 0 | 0 | 0 | 0 | 0 |
| <i>E. faecalis vanB2</i>            | <b>C3735</b>  | 1 | 0 | 0 | 0 | 0 | 0 | 1 | 0 | 0 | 0 | 0 | 0 | 0 | 0 | 0 | 0 | 0 | 0 | 0 | 0 | 0 | 0 | 0 |
| <i>E. faecalis</i>                  | <b>C410</b>   | 2 | 1 | 0 | 1 | 0 | 0 | 0 | 1 | 0 | 0 | 0 | 0 | 0 | 0 | 0 | 0 | 0 | 0 | 0 | 0 | 0 | 1 | 0 |
| <i>E.faecium vanA</i>               | <b>C2321</b>  | 0 | 0 | 0 | 0 | 0 | 0 | 0 | 0 | 0 | 0 | 0 | 0 | 0 | 0 | 0 | 0 | 0 | 0 | 0 | 0 | 0 | 0 | 0 |
| <i>E. gallinarum</i>                | <b>C2310</b>  | 2 | 2 | 0 | 1 | 0 | 0 | 2 | 0 | 2 | 0 | 0 | 0 | 0 | 0 | 0 | 0 | 0 | 0 | 0 | 0 | 0 | 0 | 0 |
| <i>E. hirae vanA</i>                | <b>C1436</b>  | 2 | 0 | 0 | 0 | 0 | 0 | 0 | 0 | 0 | 0 | 0 | 0 | 0 | 0 | 0 | 0 | 0 | 0 | 0 | 0 | 0 | 0 | 0 |
| <i>Listeria monocytogenes</i>       | <b>C137</b>   | 1 | 0 | 0 | 0 | 0 | 0 | 0 | 0 | 0 | 0 | 0 | 0 | 0 | 0 | 0 | 0 | 0 | 0 | 0 | 0 | 0 | 0 | 2 |
| <i>Micrococcus luteus</i>           | <b>C157</b>   | 4 | 2 | 2 | 1 | 2 | 1 | 0 | 0 | 0 | 0 | 0 | 0 | 0 | 0 | 0 | 0 | 0 | 0 | 0 | 0 | 0 | 0 | 0 |
| <i>Escherichia coli</i>             | <b>C408</b>   | 0 | 0 | 0 | 0 | 0 | 0 | 0 | 0 | 0 | 0 | 0 | 0 | 0 | 0 | 0 | 0 | 0 | 0 | 0 | 0 | 0 | 0 | 0 |
| <i>Pseudomonas aeruginosa</i>       | <b>C3282</b>  | 0 | 0 | 0 | 0 | 0 | 0 | 0 | 0 | 0 | 0 | 0 | 0 | 0 | 0 | 0 | 0 | 0 | 0 | 0 | 0 | 0 | 0 | 0 |

<sup>a</sup>The numbers indicate the size of the inhibition halo against each indicator bacteria: 4, halo>10mm; 3, 9>halo>6 mm; 2, 5>halo>3, 1, halo<3; 0, no halo.

<sup>b</sup>Categories of antimicrobial activity: **InterA**, Interespecific Activity (antimicrobial activity against different groups of bacteria belonging to different genera, in addition to staphylococci); **IntraA**, Intraespecific Activity (antimicrobial activity against different species of staphylococci, but not against other genera); **RA**, Reduced Activity (antimicrobial activity against one bacterial group).

<sup>c</sup>Abbreviations: MR, methicillin resistant; MS, methicillin susceptible; CoPS, coagulase-positive *Staphylococcus*; CoNS, coagulase-negative *Staphylococcus*; SA: *S. aureus*; SP: *S. pseudintermedius*.

<sup>d</sup>UR: University of La Rioja.
